# Supplementary material for: Structural and electronic features of small hybrid organic–inorganic halide perovskite clusters: a theoretical analysis
Source: Royal Society of Chemistry journal article supplement (doi:10.1039/c6cp03193e), 2016-01-01
Supplement: c6cp03193e1.pdf [file c6cp03193e1.pdf]

## SUPPORTING INFORMATION

### Structural and electronic features of small hybrid organic-inorganic halide perovskite clusters: a theoretical analysis

Giacomo Giorgi<sup>a,\*</sup>, Tomohiro Yoshihara<sup>b</sup>, Koichi Yamashita<sup>b,c,\*</sup>

<sup>a</sup>Dipartimento di Ingegneria Civile e Ambientale,  
Università degli Studi di Perugia,  
Via G. Duranti 93, 06125 Perugia, Italy

<sup>b</sup>Department of Chemical System Engineering,  
School of Engineering,  
The University of Tokyo,  
7-3-1, Hongo, Bunkyo-ku, Tokyo, Japan.

<sup>c</sup>CREST-JST, 7 Gobancho, Chiyoda-ku, Tokyo 102-0076, Japan.

Optimized structure of **1d** cluster (b3lyp/6-311G++)

| Atomic<br>Number | Coordinates (Angstroms) |           |           |
|------------------|-------------------------|-----------|-----------|
|                  | X                       | Y         | Z         |
| 53               | 6.592403                | 6.194952  | 6.854310  |
| 7                | 9.035683                | 5.166632  | 4.495069  |
| 7                | 5.619745                | 8.679173  | 9.193401  |
| 1                | 6.499804                | 8.689417  | 9.740994  |
| 1                | 8.202934                | 5.228233  | 5.109020  |
| 1                | 5.666942                | 9.496104  | 8.557763  |
| 1                | 5.668020                | 7.839360  | 8.587677  |
| 1                | 9.044680                | 6.038376  | 3.934427  |
| 1                | 9.859919                | 5.218882  | 5.121150  |
| 53               | 11.456231               | 6.174235  | 6.887257  |
| 6                | 9.034870                | 3.936300  | 3.643974  |
| 7                | 12.422527               | 8.648260  | 9.240452  |
| 1                | 12.375974               | 7.807760  | 8.635689  |
| 1                | 9.929094                | 3.929843  | 3.027990  |
| 1                | 12.389113               | 9.464310  | 8.602721  |
| 1                | 11.535668               | 8.665892  | 9.776802  |
| 1                | 9.022821                | 3.060312  | 4.285545  |
| 1                | 8.152055                | 3.942342  | 3.011737  |
| 53               | 6.619400                | 11.054709 | 6.750955  |
| 6                | 4.402088                | 8.693154  | 10.062392 |
| 7                | 9.068003                | 11.969175 | 4.348773  |
| 1                | 3.516718                | 8.679546  | 9.433891  |
| 1                | 8.236091                | 11.940700 | 4.966271  |
| 1                | 4.409236                | 9.593148  | 10.669883 |
| 1                | 4.412862                | 7.816355  | 10.702810 |
| 1                | 9.892941                | 11.935611 | 4.975056  |
| 1                | 9.067937                | 11.074577 | 3.825127  |
| 82               | 9.036702                | 8.617461  | 6.819469  |
| 53               | 11.474698               | 11.031333 | 6.784715  |
| 53               | 9.060220                | 8.545270  | 3.383657  |
| 53               | 9.013937                | 8.692362  | 10.257063 |
| 6                | 9.076226                | 13.163096 | 3.447375  |
| 6                | 13.629390               | 8.655997  | 10.124443 |
| 1                | 13.621091               | 9.557726  | 10.729327 |
| 1                | 9.967608                | 13.134540 | 2.827912  |
| 1                | 14.522349               | 8.634471  | 9.506983  |
| 1                | 13.604558               | 7.781113  | 10.767111 |
| 1                | 8.190534                | 13.140368 | 2.819598  |
| 1                | 9.076326                | 14.065019 | 4.052071  |

## Optimized structure of 2e cluster (b3lyp/6-311G++)

| Atomic<br>Number | Coordinates (Angstroms) |           |           |
|------------------|-------------------------|-----------|-----------|
|                  | X                       | Y         | Z         |
| 6                | 4.336457                | 6.326819  | 2.897790  |
| 7                | 3.972125                | 4.937641  | 2.466838  |
| 53               | 0.490566                | 4.466080  | 3.148164  |
| 7                | 0.700884                | 3.072345  | -1.069406 |
| 6                | -0.393784               | 4.071850  | -1.311517 |
| 53               | -0.084896               | -1.979988 | 4.587225  |
| 82               | 0.234119                | 1.302403  | 3.398180  |
| 53               | 2.555235                | 0.613639  | 1.456539  |
| 53               | 1.198769                | -4.170414 | -0.161891 |
| 7                | 2.833439                | -1.923841 | -2.412358 |
| 6                | 3.085442                | -2.873977 | -3.545720 |
| 53               | 1.437352                | 1.016369  | -3.923237 |
| 7                | -1.545363               | -2.554563 | 1.385386  |
| 6                | -2.830090               | -3.316540 | 1.278550  |
| 53               | -1.872296               | 1.055428  | 1.137956  |
| 1                | -2.664200               | -4.334256 | 1.617428  |
| 1                | -3.580051               | -2.836101 | 1.899576  |
| 1                | -3.154561               | -3.323747 | 0.242343  |
| 1                | 2.131759                | -3.187973 | -3.957202 |
| 1                | 3.670937                | -2.366030 | -4.305281 |
| 1                | 3.626547                | -3.735394 | -3.167835 |
| 1                | 3.695313                | 7.031990  | 2.378356  |
| 1                | 4.195089                | 6.413356  | 3.970502  |
| 1                | 5.375011                | 6.512944  | 2.643155  |
| 1                | -0.469879               | 4.720543  | -0.444362 |
| 1                | -0.141007               | 4.651374  | -2.193671 |
| 1                | -1.327871               | 3.540333  | -1.461174 |
| 1                | 0.824286                | 2.439812  | -1.885199 |
| 1                | 1.606172                | 3.556393  | -0.921679 |
| 1                | 0.498488                | 2.489850  | -0.253404 |
| 1                | 4.597281                | 4.239880  | 2.900274  |
| 1                | 4.037351                | 4.848212  | 1.434020  |
| 1                | 2.993307                | 4.715814  | 2.726482  |
| 1                | 3.727045                | -1.577935 | -2.024694 |
| 1                | 2.300925                | -1.096418 | -2.743117 |
| 1                | 2.302545                | -2.399517 | -1.660692 |
| 1                | -1.656874               | -1.573235 | 1.085320  |
| 1                | -1.201909               | -2.517458 | 2.366015  |
| 1                | -0.791122               | -2.995572 | 0.819110  |
| 82               | 6.500526                | 0.534516  | 1.369773  |
| 53               | 6.306270                | -1.996124 | 3.251067  |
| 53               | 6.126914                | -0.557881 | -1.746542 |
| 53               | 3.811130                | 4.936217  | -1.078670 |
| 53               | 6.430169                | 2.750559  | 3.978358  |
| 53               | 9.584145                | 0.539652  | 1.381455  |
| 7                | 2.825007                | -3.206058 | 2.879273  |
| 6                | 3.126366                | -4.521717 | 3.535163  |
| 1                | 3.448427                | -4.341163 | 4.555600  |
| 1                | 2.224203                | -5.124950 | 3.528549  |
| 1                | 3.912635                | -5.020867 | 2.978406  |
| 1                | 3.661725                | -2.609443 | 2.855385  |
| 1                | 2.482491                | -3.359293 | 1.911040  |
| 1                | 2.071767                | -2.710919 | 3.392782  |
| 7                | 4.695048                | 2.359851  | -3.345459 |
| 1                | 3.756309                | 1.996149  | -3.609683 |
| 6                | 5.445759                | 2.865239  | -4.538034 |
| 1                | 5.197109                | 1.586993  | -2.875134 |
| 1                | 4.539885                | 3.116808  | -2.650331 |
| 1                | 6.418605                | 3.226832  | -4.218869 |
| 1                | 5.567681                | 2.055545  | -5.251218 |
| 1                | 4.882181                | 3.675431  | -4.990336 |
| 7                | 8.756417                | 0.205426  | 4.809636  |
| 1                | 8.153228                | -0.626050 | 4.725133  |
| 6                | 9.721527                | 0.117520  | 5.951201  |
| 1                | 8.123859                | 1.024484  | 4.879158  |
| 1                | 9.236914                | 0.303527  | 3.891009  |
| 1                | 10.314561               | 1.026475  | 5.980700  |
| 1                | 9.170178                | 0.007357  | 6.880027  |
| 1                | 10.371692               | -0.739629 | 5.802056  |

## Optimized structure of **8c** cluster (PM6)

| Atomic<br>Number | Coordinates (Angstroms) |           |           |
|------------------|-------------------------|-----------|-----------|
|                  | X                       | Y         | Z         |
| 82               | -0.196169               | -0.112638 | -0.170154 |
| 53               | 2.957308                | 0.045000  | -0.024536 |
| 53               | 0.127183                | 2.881854  | 0.153581  |
| 53               | -0.036394               | 0.104632  | 2.857119  |
| 53               | -3.037132               | 0.033555  | -0.027607 |
| 53               | 0.245957                | -3.010361 | 0.099832  |
| 53               | 0.284687                | 0.286463  | -3.073841 |
| 82               | -0.239519               | -0.204203 | 5.936310  |
| 53               | 2.785481                | 0.024293  | 5.611517  |
| 53               | -0.067387               | 2.820771  | 5.739218  |
| 53               | -0.052432               | 0.008131  | 8.805724  |
| 53               | -3.152159               | -0.021300 | 5.685175  |
| 53               | 0.138521                | -3.095064 | 5.454421  |
| 82               | -0.072831               | 5.900518  | -0.065212 |
| 53               | 2.936845                | 5.822824  | 0.096882  |
| 53               | -0.065977               | 8.793734  | -0.009742 |
| 53               | 0.065984                | 5.705428  | 2.893856  |
| 53               | -3.026916               | 5.518851  | 0.231857  |
| 53               | 0.273166                | 5.543830  | -3.045071 |
| 82               | -0.232450               | 5.877414  | 5.958332  |
| 53               | 2.798272                | 5.582343  | 5.650560  |
| 53               | 0.131685                | 8.735821  | 5.587912  |
| 53               | 0.087568                | 5.601697  | 8.825525  |
| 53               | -3.119043               | 5.558145  | 5.500068  |
| 82               | 5.859395                | -0.092871 | -0.129250 |
| 53               | 8.988062                | -0.424842 | -0.034868 |
| 53               | 5.926719                | 2.818088  | -0.101884 |
| 53               | 5.720140                | -0.121768 | 2.773444  |
| 53               | 5.714231                | -3.198492 | -0.115328 |
| 53               | 5.849656                | -0.269386 | -3.226136 |
| 82               | 5.765185                | -0.158145 | 5.792973  |
| 53               | 8.734144                | 0.246400  | 5.483038  |
| 53               | 5.518835                | 2.824239  | 5.546536  |
| 53               | 5.463995                | 0.153186  | 8.721388  |
| 53               | 5.717230                | -3.073843 | 5.749710  |
| 82               | 5.913195                | 6.064578  | -0.186987 |
| 53               | 8.877530                | 5.796258  | 0.022893  |
| 53               | 5.824273                | 8.928343  | 0.068464  |
| 53               | 5.744137                | 5.763382  | 2.810242  |
| 53               | 5.627497                | 5.738418  | -3.087456 |
| 82               | 5.844600                | 5.861983  | 5.843904  |
| 53               | 8.735300                | 5.512038  | 5.549691  |
| 53               | 5.472631                | 8.742078  | 5.662195  |
| 53               | 5.419614                | 5.452222  | 8.752442  |
| 6                | -3.057224               | -3.239275 | 1.994290  |
| 7                | -2.440864               | -2.387461 | 3.061931  |
| 1                | -3.141693               | -2.023508 | 3.744609  |
| 1                | -1.701095               | -2.908697 | 3.609240  |
| 1                | -1.959273               | -1.544432 | 2.630104  |
| 1                | -3.556965               | -4.126401 | 2.408757  |
| 1                | -2.273450               | -3.577153 | 1.267448  |
| 1                | -3.786211               | -2.659143 | 1.390048  |
| 6                | -3.048297               | 2.148391  | -3.178246 |
| 7                | -2.290924               | 3.170701  | -2.386773 |
| 1                | -1.727691               | 3.814593  | -2.998226 |
| 1                | -2.919972               | 3.761601  | -1.788596 |
| 1                | -1.602375               | 2.697861  | -1.730170 |
| 1                | -3.776129               | 2.609390  | -3.860769 |
| 1                | -3.584700               | 1.442996  | -2.499169 |
| 1                | -2.350301               | 1.512117  | -3.769692 |
| 6                | -3.724965               | 2.431727  | 2.827546  |
| 7                | -2.337396               | 2.997757  | 2.881232  |
| 1                | -1.620382               | 2.225584  | 2.939963  |
| 1                | -2.130308               | 3.567156  | 2.019152  |
| 1                | -2.217970               | 3.621219  | 3.721629  |
| 1                | -3.844210               | 1.769780  | 1.937268  |
| 1                | -4.482670               | 3.230977  | 2.768191  |
| 1                | -3.933505               | 1.812793  | 3.730134  |
| 6                | -3.241107               | 3.669705  | 8.880630  |
| 7                | -2.536495               | 2.576737  | 8.136328  |
| 1                | -3.196952               | 1.945357  | 7.626192  |

|   |           |           |           |
|---|-----------|-----------|-----------|
| 1 | -1.882181 | 2.993803  | 7.404462  |
| 1 | -1.943619 | 1.979495  | 8.763338  |
| 1 | -3.810199 | 4.321900  | 8.178313  |
| 1 | -2.502845 | 4.348192  | 9.373645  |
| 1 | -3.929552 | 3.278841  | 9.643289  |
| 6 | -2.947646 | 9.399643  | 2.770191  |
| 7 | -2.473867 | 7.983664  | 2.905846  |
| 1 | -2.731272 | 7.404445  | 2.059799  |
| 1 | -1.421780 | 7.951290  | 2.993683  |
| 1 | -2.865643 | 7.510145  | 3.766184  |
| 1 | -2.515150 | 9.868311  | 1.859298  |
| 1 | -2.630276 | 10.006054 | 3.641662  |
| 1 | -4.046355 | 9.454595  | 2.692317  |
| 6 | 2.489164  | -3.588187 | -3.009220 |
| 7 | 2.776144  | -2.209964 | -2.495054 |
| 1 | 2.014618  | -1.519233 | -2.786873 |
| 1 | 2.792076  | -2.204255 | -1.435941 |
| 1 | 3.703889  | -1.841555 | -2.823391 |
| 1 | 1.516805  | -3.952318 | -2.601175 |
| 1 | 3.266578  | -4.304436 | -2.686481 |
| 1 | 2.420461  | -3.606444 | -4.109127 |
| 6 | 3.348975  | -3.569160 | 2.860691  |
| 7 | 2.610942  | -2.266740 | 2.798111  |
| 1 | 1.969844  | -2.236716 | 1.958995  |
| 1 | 2.024228  | -2.125386 | 3.661950  |
| 1 | 3.280301  | -1.459477 | 2.726530  |
| 1 | 2.654800  | -4.419785 | 2.950278  |
| 1 | 4.041246  | -3.590795 | 3.738701  |
| 1 | 3.971311  | -3.718322 | 1.949662  |
| 6 | 2.006235  | -3.218762 | 8.813746  |
| 7 | 3.048148  | -2.461875 | 8.047422  |
| 1 | 2.594218  | -1.882654 | 7.280556  |
| 1 | 3.582267  | -1.792052 | 8.654703  |
| 1 | 3.745467  | -3.091995 | 7.579328  |
| 1 | 1.267855  | -2.514944 | 9.272048  |
| 1 | 2.444272  | -3.839024 | 9.608811  |
| 1 | 1.408841  | -3.867762 | 8.135038  |
| 6 | 3.394224  | 2.693343  | -3.517318 |
| 7 | 2.805220  | 3.019579  | -2.178074 |
| 1 | 2.276723  | 2.196749  | -1.788276 |
| 1 | 3.556652  | 3.275421  | -1.489412 |
| 1 | 2.134472  | 3.832370  | -2.248989 |
| 1 | 4.101765  | 1.835252  | -3.443635 |
| 1 | 3.961451  | 3.560128  | -3.919254 |
| 1 | 2.606937  | 2.419910  | -4.241798 |
| 6 | 3.435346  | 2.895195  | 2.287471  |
| 7 | 2.346136  | 2.856916  | 3.308890  |
| 1 | 1.590420  | 3.544283  | 3.068010  |
| 1 | 1.917796  | 1.902216  | 3.360308  |
| 1 | 2.720947  | 3.105815  | 4.253883  |
| 1 | 3.053735  | 2.613224  | 1.285409  |
| 1 | 4.258256  | 2.200435  | 2.554919  |
| 1 | 3.872967  | 3.914958  | 2.209306  |
| 6 | 2.554002  | 2.673588  | 9.475315  |
| 7 | 2.830652  | 2.864326  | 8.013349  |
| 1 | 3.218772  | 1.986384  | 7.585576  |
| 1 | 1.948341  | 3.111109  | 7.492757  |
| 1 | 3.529549  | 3.640190  | 7.860233  |
| 1 | 1.820248  | 1.847490  | 9.630014  |
| 1 | 2.122503  | 3.593296  | 9.918519  |
| 1 | 3.478024  | 2.416663  | 10.025013 |
| 6 | 3.619503  | 8.997202  | -3.107778 |
| 7 | 2.552845  | 8.206701  | -2.413794 |
| 1 | 1.997043  | 7.612955  | -3.077275 |
| 1 | 2.987780  | 7.540187  | -1.705073 |
| 1 | 1.877137  | 8.812241  | -1.884700 |
| 1 | 4.338028  | 8.316738  | -3.625938 |
| 1 | 4.236057  | 9.563541  | -2.372086 |
| 1 | 3.204133  | 9.701446  | -3.842534 |
| 6 | 2.813125  | 9.320111  | 2.366793  |
| 7 | 2.874702  | 8.024493  | 3.116176  |
| 1 | 2.014745  | 7.888785  | 3.708479  |
| 1 | 2.940245  | 7.209434  | 2.451341  |
| 1 | 3.716651  | 7.994555  | 3.749249  |
| 1 | 1.917536  | 9.349221  | 1.698658  |
| 1 | 3.710014  | 9.443681  | 1.715283  |
| 1 | 2.759219  | 10.180140 | 3.052265  |

|   |           |           |           |
|---|-----------|-----------|-----------|
| 6 | 2.820710  | 9.356953  | 8.567434  |
| 7 | 2.824126  | 7.900900  | 8.209153  |
| 1 | 2.821198  | 7.780380  | 7.158047  |
| 1 | 3.685975  | 7.404436  | 8.567033  |
| 1 | 1.968057  | 7.401533  | 8.576024  |
| 1 | 3.713830  | 9.864464  | 8.144028  |
| 1 | 2.821558  | 9.508227  | 9.658972  |
| 1 | 1.923588  | 9.859272  | 8.146773  |
| 6 | 8.950980  | -3.618667 | -3.282604 |
| 7 | 8.132309  | -2.695180 | -2.437722 |
| 1 | 7.534085  | -2.024161 | -3.019506 |
| 1 | 7.447586  | -3.216470 | -1.792990 |
| 1 | 8.731498  | -2.081409 | -1.794390 |
| 1 | 8.310460  | -4.238636 | -3.936574 |
| 1 | 9.554011  | -4.304436 | -2.659389 |
| 1 | 9.648162  | -3.058475 | -3.932293 |
| 6 | 8.762912  | -3.634311 | 3.412331  |
| 7 | 8.221988  | -2.307551 | 2.970977  |
| 1 | 7.171534  | -2.342998 | 2.872503  |
| 1 | 8.432641  | -1.553018 | 3.694859  |
| 1 | 8.612202  | -1.992420 | 2.044559  |
| 1 | 8.299928  | -3.929678 | 4.385707  |
| 1 | 9.854757  | -3.597221 | 3.564000  |
| 1 | 8.531538  | -4.428379 | 2.681985  |
| 6 | 8.955899  | 2.240620  | -2.985102 |
| 7 | 8.208931  | 3.465544  | -2.556824 |
| 1 | 7.893859  | 4.054030  | -3.355601 |
| 1 | 7.328618  | 3.184159  | -2.009449 |
| 1 | 8.774528  | 4.077705  | -1.902295 |
| 1 | 8.316378  | 1.588997  | -3.618548 |
| 1 | 9.227871  | 1.618493  | -2.095262 |
| 1 | 9.876879  | 2.485231  | -3.533972 |
| 6 | 9.191892  | 2.712251  | 2.220911  |
| 7 | 7.949670  | 2.946549  | 3.025319  |
| 1 | 7.131703  | 3.158458  | 2.397826  |
| 1 | 7.707898  | 2.100972  | 3.601397  |
| 1 | 8.070647  | 3.764176  | 3.684156  |
| 1 | 9.067694  | 1.840725  | 1.536792  |
| 1 | 10.059193 | 2.512819  | 2.870514  |
| 1 | 9.420913  | 3.598397  | 1.584011  |
| 6 | 8.759830  | 3.648891  | 8.841893  |
| 7 | 7.961339  | 2.636538  | 8.077722  |
| 1 | 8.557390  | 2.079207  | 7.415375  |
| 1 | 7.460347  | 1.963433  | 8.705940  |
| 1 | 7.218786  | 3.117055  | 7.489583  |
| 1 | 9.533189  | 3.180121  | 9.466521  |
| 1 | 8.097928  | 4.269366  | 9.486906  |
| 1 | 9.249262  | 4.369342  | 8.140799  |
| 6 | 8.812616  | 8.941292  | 3.824014  |
| 7 | 8.223291  | 8.156263  | 2.691900  |
| 1 | 7.560299  | 8.730976  | 2.110883  |
| 1 | 8.947951  | 7.764412  | 2.053471  |
| 1 | 7.661336  | 7.331003  | 3.069027  |
| 1 | 9.398390  | 9.802680  | 3.474273  |
| 1 | 9.457098  | 8.296200  | 4.461360  |
| 1 | 8.003048  | 9.308982  | 4.505965  |

---

## Optimized structure of **12b** cluster (PM6)

| Atomic<br>Number | Coordinates (Angstroms) |           |           |
|------------------|-------------------------|-----------|-----------|
|                  | X                       | Y         | Z         |
| 82               | -0.179538               | -0.207482 | -0.183058 |
| 53               | 2.861867                | -0.017485 | -0.009867 |
| 53               | 0.013418                | 2.814877  | 0.066323  |
| 53               | 0.021393                | 0.097990  | 2.800050  |
| 53               | -3.071194               | -0.043878 | -0.008544 |
| 53               | 0.127145                | -3.114488 | 0.184064  |
| 53               | 0.103861                | 0.183528  | -3.101821 |
| 82               | -0.141781               | -0.180119 | 5.778946  |
| 53               | 2.906395                | 0.004863  | 5.506192  |
| 53               | 0.068755                | 2.810108  | 5.605486  |
| 53               | 0.285477                | 0.156485  | 8.720571  |
| 53               | -2.997303               | -0.052082 | 5.723964  |
| 53               | 0.210292                | -3.107367 | 5.404514  |
| 82               | -0.194012               | 5.826843  | -0.145558 |
| 53               | 2.849149                | 5.509128  | 0.047004  |
| 53               | 0.173228                | 8.730811  | 0.217737  |
| 53               | 0.089976                | 5.676147  | 2.872397  |
| 53               | -3.052041               | 5.549162  | 0.230933  |
| 53               | 0.157957                | 5.519765  | -3.052337 |
| 82               | -0.186359               | 5.841967  | 5.903839  |
| 53               | 2.870823                | 5.621236  | 5.605272  |
| 53               | -0.064738               | 8.724415  | 5.722347  |
| 53               | 0.185692                | 5.371274  | 8.776502  |
| 53               | -3.042511               | 5.442182  | 5.548620  |
| 82               | 5.751624                | -0.231089 | -0.223871 |
| 53               | 8.628550                | -0.056816 | -0.003151 |
| 53               | 5.727758                | 2.735593  | -0.506671 |
| 53               | 5.797049                | -0.563378 | 2.758944  |
| 53               | 5.776892                | -3.297911 | -0.430587 |
| 53               | 5.783807                | -0.421192 | -3.249226 |
| 82               | 5.776917                | -0.201347 | 5.710517  |
| 53               | 8.649907                | 0.057684  | 5.648210  |
| 53               | 5.869542                | 2.800191  | 5.892080  |
| 53               | 5.617713                | -0.249416 | 8.753374  |
| 53               | 5.824469                | -3.212794 | 6.006710  |
| 82               | 5.734459                | 5.668542  | -0.115666 |
| 53               | 8.599980                | 5.569380  | 0.114184  |
| 53               | 5.540078                | 8.681141  | -0.104295 |
| 53               | 5.728640                | 5.802770  | 2.853315  |
| 53               | 5.740173                | 6.012733  | -3.163706 |
| 82               | 5.753929                | 5.739262  | 5.776945  |
| 53               | 8.643870                | 5.642137  | 5.659167  |
| 53               | 5.738788                | 8.777516  | 6.028250  |
| 53               | 5.794362                | 5.927207  | 8.859665  |
| 82               | 11.624448               | -0.125336 | -0.130483 |
| 53               | 14.549781               | 0.219572  | 0.190042  |
| 53               | 11.389145               | 2.840429  | 0.161267  |
| 53               | 11.411457               | 0.069641  | 2.890501  |
| 53               | 11.379470               | -3.085626 | 0.202943  |
| 53               | 11.363891               | 0.173158  | -3.018535 |
| 82               | 11.655185               | -0.171186 | 5.887629  |
| 53               | 14.548996               | 0.206985  | 5.564489  |
| 53               | 11.453423               | 2.869668  | 5.706481  |
| 53               | 11.331101               | 0.200313  | 8.799169  |
| 53               | 11.302131               | -3.061449 | 5.625141  |
| 82               | 11.642651               | 5.850083  | -0.101287 |
| 53               | 14.524206               | 5.645365  | 0.016139  |
| 53               | 11.239243               | 8.727922  | 0.231443  |
| 53               | 11.476639               | 5.621485  | 2.905845  |
| 53               | 11.249312               | 5.507576  | -3.012960 |
| 82               | 11.685527               | 5.877501  | 5.943402  |
| 53               | 14.555856               | 5.651385  | 5.641854  |
| 53               | 11.297951               | 8.768965  | 5.533240  |
| 53               | 11.256661               | 5.575740  | 8.824988  |
| 6                | -3.713179               | -2.862396 | 2.939461  |
| 7                | -2.260719               | -2.506121 | 2.830599  |

|   |           |           |           |
|---|-----------|-----------|-----------|
| 1 | -1.821887 | -2.887634 | 1.949469  |
| 1 | -2.137478 | -1.456418 | 2.802623  |
| 1 | -1.706680 | -2.855407 | 3.663037  |
| 1 | -4.281365 | -2.464990 | 2.073393  |
| 1 | -4.153079 | -2.422371 | 3.861312  |
| 1 | -3.862621 | -3.954369 | 2.977995  |
| 6 | -3.208842 | 3.651366  | -3.116679 |
| 7 | -2.472276 | 2.576755  | -2.376089 |
| 1 | -1.852172 | 2.005625  | -3.006045 |
| 1 | -1.840767 | 3.006394  | -1.636737 |
| 1 | -3.115154 | 1.914814  | -1.876756 |
| 1 | -2.491792 | 4.342919  | -3.620467 |
| 1 | -3.787330 | 4.291938  | -2.411407 |
| 1 | -3.894837 | 3.240319  | -3.871622 |
| 6 | -3.684441 | 2.321926  | 2.886021  |
| 7 | -2.342624 | 2.989611  | 2.854526  |
| 1 | -1.570082 | 2.273592  | 2.802964  |
| 1 | -2.256458 | 3.623206  | 2.017660  |
| 1 | -2.191120 | 3.570010  | 3.721486  |
| 1 | -3.830041 | 1.685570  | 1.981917  |
| 1 | -4.501463 | 3.060096  | 2.930809  |
| 1 | -3.769318 | 1.650618  | 3.775563  |
| 6 | -3.664001 | 2.809176  | 8.591074  |
| 7 | -2.226707 | 2.756284  | 8.166264  |
| 1 | -2.152648 | 2.762488  | 7.112236  |
| 1 | -1.678750 | 3.593782  | 8.515371  |
| 1 | -1.746920 | 1.879825  | 8.501353  |
| 1 | -4.156639 | 3.718915  | 8.185427  |
| 1 | -3.763824 | 2.826101  | 9.689173  |
| 1 | -4.219131 | 1.928594  | 8.205860  |
| 6 | -3.712692 | 8.552377  | 2.895300  |
| 7 | -2.270879 | 8.138881  | 2.895634  |
| 1 | -1.755464 | 8.497082  | 2.047498  |
| 1 | -1.765644 | 8.470079  | 3.765322  |
| 1 | -2.189680 | 7.084837  | 2.877969  |
| 1 | -3.822479 | 9.649507  | 2.916564  |
| 1 | -4.237442 | 8.135389  | 3.780939  |
| 1 | -4.229557 | 8.168451  | 1.990560  |
| 6 | 1.874280  | -3.191800 | -3.231227 |
| 7 | 2.965028  | -2.471342 | -2.498781 |
| 1 | 3.591761  | -1.923325 | -3.142332 |
| 1 | 2.550848  | -1.776941 | -1.809273 |
| 1 | 3.577471  | -3.122120 | -1.944805 |
| 1 | 1.215249  | -2.468357 | -3.766988 |
| 1 | 1.204232  | -3.724055 | -2.515265 |
| 1 | 2.269575  | -3.917800 | -3.955414 |
| 6 | 3.579037  | -3.587341 | 2.802528  |
| 7 | 2.644650  | -2.415992 | 2.761586  |
| 1 | 2.035321  | -2.443536 | 1.902064  |
| 1 | 2.015727  | -2.401538 | 3.609359  |
| 1 | 3.185056  | -1.512190 | 2.746213  |
| 1 | 3.030376  | -4.541239 | 2.821826  |
| 1 | 4.235724  | -3.542714 | 3.704374  |
| 1 | 4.256573  | -3.588612 | 1.915420  |
| 6 | 2.694746  | -3.812353 | 8.383660  |
| 7 | 2.785688  | -2.350801 | 8.061373  |
| 1 | 2.774928  | -2.203086 | 7.014936  |
| 1 | 1.967426  | -1.809234 | 8.452794  |
| 1 | 3.683743  | -1.917906 | 8.420806  |
| 1 | 1.772103  | -4.251390 | 7.944766  |
| 1 | 2.675307  | -3.988990 | 9.470930  |
| 1 | 3.558684  | -4.361058 | 7.953151  |
| 6 | 3.542170  | 2.781862  | -3.556228 |
| 7 | 2.587125  | 2.788021  | -2.400646 |
| 1 | 1.987142  | 3.653775  | -2.404258 |
| 1 | 1.949778  | 1.947588  | -2.428938 |
| 1 | 3.112439  | 2.763931  | -1.487680 |
| 1 | 3.011178  | 2.791802  | -4.519834 |
| 1 | 4.198649  | 1.878048  | -3.526319 |
| 1 | 4.220358  | 3.666959  | -3.518178 |
| 6 | 3.774956  | 2.441336  | 2.727853  |
| 7 | 2.424436  | 3.066075  | 2.857673  |
| 1 | 1.805252  | 2.780708  | 2.060521  |
| 1 | 1.959604  | 2.771375  | 3.751048  |
| 1 | 2.492157  | 4.107721  | 2.855849  |
| 1 | 3.705458  | 1.333298  | 2.744652  |
| 1 | 4.450815  | 2.747622  | 3.554439  |



|   |          |           |           |
|---|----------|-----------|-----------|
| 1 | 4.270283 | 2.729582  | 1.776341  |
| 6 | 3.315633 | 3.027771  | 9.313262  |
| 7 | 2.844040 | 2.702904  | 7.926758  |
| 1 | 2.444831 | 3.554026  | 7.454577  |
| 1 | 3.641052 | 2.353693  | 7.332905  |
| 1 | 2.093528 | 1.961001  | 7.945703  |
| 1 | 4.142128 | 3.778953  | 9.283730  |
| 1 | 3.706449 | 2.124896  | 9.821879  |
| 1 | 2.495788 | 3.454351  | 9.920724  |
| 6 | 2.545019 | 9.368064  | -2.798840 |
| 7 | 2.778159 | 7.930465  | -2.440048 |
| 1 | 3.688203 | 7.561914  | -2.832314 |
| 1 | 2.834407 | 7.817937  | -1.391315 |
| 1 | 1.984080 | 7.311670  | -2.773617 |
| 1 | 3.367255 | 10.007092 | -2.420698 |
| 1 | 1.600989 | 9.734630  | -2.334207 |
| 1 | 2.464148 | 9.507175  | -3.889395 |
| 6 | 2.953280 | 9.240519  | 3.482943  |
| 7 | 2.891717 | 8.017580  | 2.619579  |
| 1 | 2.045074 | 8.038230  | 1.989334  |
| 1 | 3.750231 | 7.936943  | 2.019108  |
| 1 | 2.829489 | 7.150807  | 3.212580  |
| 1 | 2.997817 | 10.160942 | 2.881066  |
| 1 | 3.852096 | 9.214158  | 4.148325  |
| 1 | 2.059577 | 9.298423  | 4.151821  |
| 6 | 1.955723 | 8.730324  | 8.959194  |
| 7 | 2.991138 | 7.991829  | 8.166428  |
| 1 | 2.528433 | 7.315135  | 7.493116  |
| 1 | 3.593223 | 8.631978  | 7.588178  |
| 1 | 3.635627 | 7.421751  | 8.774093  |
| 1 | 1.260811 | 9.282889  | 8.283214  |
| 1 | 2.403911 | 9.440246  | 9.667917  |
| 1 | 1.308752 | 8.016972  | 9.522244  |
| 6 | 8.982043 | -2.972364 | -3.753885 |
| 7 | 8.778362 | -2.558529 | -2.326795 |
| 1 | 7.865532 | -2.923642 | -1.932188 |
| 1 | 9.570647 | -2.883860 | -1.709181 |
| 1 | 8.744946 | -1.504848 | -2.249871 |
| 1 | 9.043335 | -4.068422 | -3.855169 |
| 1 | 9.922514 | -2.535327 | -4.155144 |
| 1 | 8.150379 | -2.607214 | -4.389927 |
| 6 | 7.983924 | -3.613492 | 2.805427  |
| 7 | 8.899335 | -2.427357 | 2.864824  |
| 1 | 9.556282 | -2.413102 | 2.041121  |
| 1 | 8.343224 | -1.531360 | 2.848451  |
| 1 | 9.475778 | -2.433475 | 3.745363  |
| 1 | 7.338320 | -3.574274 | 1.895224  |
| 1 | 7.293256 | -3.627072 | 3.683663  |
| 1 | 8.546221 | -4.559027 | 2.791163  |
| 6 | 8.889737 | -2.786878 | 9.488307  |
| 7 | 8.653951 | -2.414725 | 8.055036  |
| 1 | 9.445206 | -2.744169 | 7.432603  |
| 1 | 7.744340 | -2.807949 | 7.681443  |
| 1 | 8.600363 | -1.366440 | 7.948262  |
| 1 | 8.970386 | -3.878658 | 9.616583  |
| 1 | 8.068398 | -2.417906 | 10.133334 |
| 1 | 9.834178 | -2.326466 | 9.858064  |
| 6 | 7.937215 | 2.813309  | -3.556638 |
| 7 | 8.856855 | 2.803106  | -2.372592 |
| 1 | 9.494200 | 1.964349  | -2.395194 |
| 1 | 9.455801 | 3.671105  | -2.347300 |
| 1 | 8.304824 | 2.766154  | -1.476488 |
| 1 | 8.497204 | 2.847198  | -4.503163 |
| 1 | 7.252084 | 3.693790  | -3.522269 |
| 1 | 7.287412 | 1.904919  | -3.564782 |
| 6 | 7.767770 | 2.603772  | 2.466828  |
| 7 | 9.037576 | 2.955717  | 3.172420  |
| 1 | 9.781136 | 2.244628  | 2.968684  |
| 1 | 9.390901 | 3.891745  | 2.862488  |
| 1 | 8.893528 | 2.987639  | 4.205106  |
| 1 | 7.903305 | 2.631442  | 1.365419  |
| 1 | 6.945100 | 3.304870  | 2.723572  |
| 1 | 7.422241 | 1.582249  | 2.738200  |
| 6 | 7.912914 | 2.770540  | 9.288599  |
| 7 | 8.825612 | 2.853362  | 8.102813  |
| 1 | 8.265619 | 2.859947  | 7.210256  |
| 1 | 9.407302 | 3.731091  | 8.128454  |

|   |           |           |           |
|---|-----------|-----------|-----------|
| 1 | 9.480429  | 2.028738  | 8.069105  |
| 1 | 7.235186  | 3.657000  | 9.331288  |
| 1 | 8.476104  | 2.717137  | 10.232001 |
| 1 | 7.251445  | 1.871292  | 9.221061  |
| 6 | 8.878328  | 9.392300  | -2.756250 |
| 7 | 8.642082  | 7.962019  | -2.371515 |
| 1 | 7.725630  | 7.590322  | -2.749710 |
| 1 | 9.427896  | 7.334381  | -2.707989 |
| 1 | 8.606021  | 7.862425  | -1.321408 |
| 1 | 8.961537  | 9.510592  | -3.849187 |
| 1 | 9.824093  | 9.764647  | -2.298066 |
| 1 | 8.057224  | 10.040130 | -2.393037 |
| 6 | 7.867941  | 9.183647  | 2.877949  |
| 7 | 8.776854  | 7.992124  | 2.869912  |
| 1 | 9.421291  | 8.011805  | 2.035103  |
| 1 | 9.370252  | 7.960900  | 3.738172  |
| 1 | 8.216533  | 7.102185  | 2.826858  |
| 1 | 8.434820  | 10.126367 | 2.883913  |
| 1 | 7.199997  | 9.170639  | 3.773735  |
| 1 | 7.197222  | 9.179806  | 1.983245  |
| 6 | 8.801871  | 9.465081  | 8.507971  |
| 7 | 8.663050  | 8.011523  | 8.166208  |
| 1 | 8.658455  | 7.879902  | 7.117244  |
| 1 | 9.470528  | 7.440358  | 8.542480  |
| 1 | 7.757345  | 7.600113  | 8.526256  |
| 1 | 9.738413  | 9.878667  | 8.071845  |
| 1 | 8.830215  | 9.626661  | 9.597555  |
| 1 | 7.957756  | 10.048824 | 8.086525  |
| 6 | 14.634666 | -3.125209 | 3.692687  |
| 7 | 13.949406 | -2.330219 | 2.623040  |
| 1 | 13.324536 | -2.925359 | 2.021206  |
| 1 | 13.332361 | -1.581685 | 3.057082  |
| 1 | 14.624049 | -1.835058 | 1.993751  |
| 1 | 13.884625 | -3.608596 | 4.364565  |
| 1 | 15.236778 | -2.461473 | 4.354882  |
| 1 | 15.290004 | -3.903801 | 3.276108  |
| 6 | 14.225524 | 2.838432  | -3.691041 |
| 7 | 13.926692 | 2.876450  | -2.221865 |
| 1 | 14.304193 | 3.750880  | -1.762534 |
| 1 | 12.882103 | 2.874382  | -2.058712 |
| 1 | 14.313021 | 2.033222  | -1.719452 |
| 1 | 13.783739 | 3.719547  | -4.202685 |
| 1 | 13.784048 | 1.929458  | -4.155285 |
| 1 | 15.310122 | 2.833368  | -3.886878 |
| 6 | 15.266369 | 3.126483  | 2.735082  |
| 7 | 13.815638 | 2.811059  | 2.951844  |
| 1 | 13.700564 | 2.045012  | 3.664888  |
| 1 | 13.292382 | 3.659437  | 3.295222  |
| 1 | 13.357933 | 2.498351  | 2.055755  |
| 1 | 15.744997 | 3.461063  | 3.676199  |
| 1 | 15.379172 | 3.945535  | 1.984801  |
| 1 | 15.812769 | 2.242872  | 2.353678  |
| 6 | 14.608509 | 3.668464  | 8.952043  |
| 7 | 13.927151 | 2.608400  | 8.140431  |
| 1 | 13.317500 | 3.052204  | 7.390479  |
| 1 | 14.603352 | 1.981027  | 7.643877  |
| 1 | 13.292213 | 2.002586  | 8.722812  |
| 1 | 15.214088 | 4.338637  | 8.299763  |
| 1 | 15.259857 | 3.243061  | 9.729785  |
| 1 | 13.855164 | 4.333897  | 9.439357  |
| 6 | 14.605064 | 8.917261  | 2.064211  |
| 7 | 13.881507 | 8.132319  | 3.116219  |
| 1 | 13.269455 | 7.389645  | 2.665257  |
| 1 | 14.532462 | 7.632810  | 3.768888  |
| 1 | 13.242397 | 8.733617  | 3.697763  |
| 1 | 15.224869 | 8.247584  | 1.425607  |
| 1 | 15.249512 | 9.696845  | 2.496423  |
| 1 | 13.877165 | 9.397660  | 1.365821  |

---

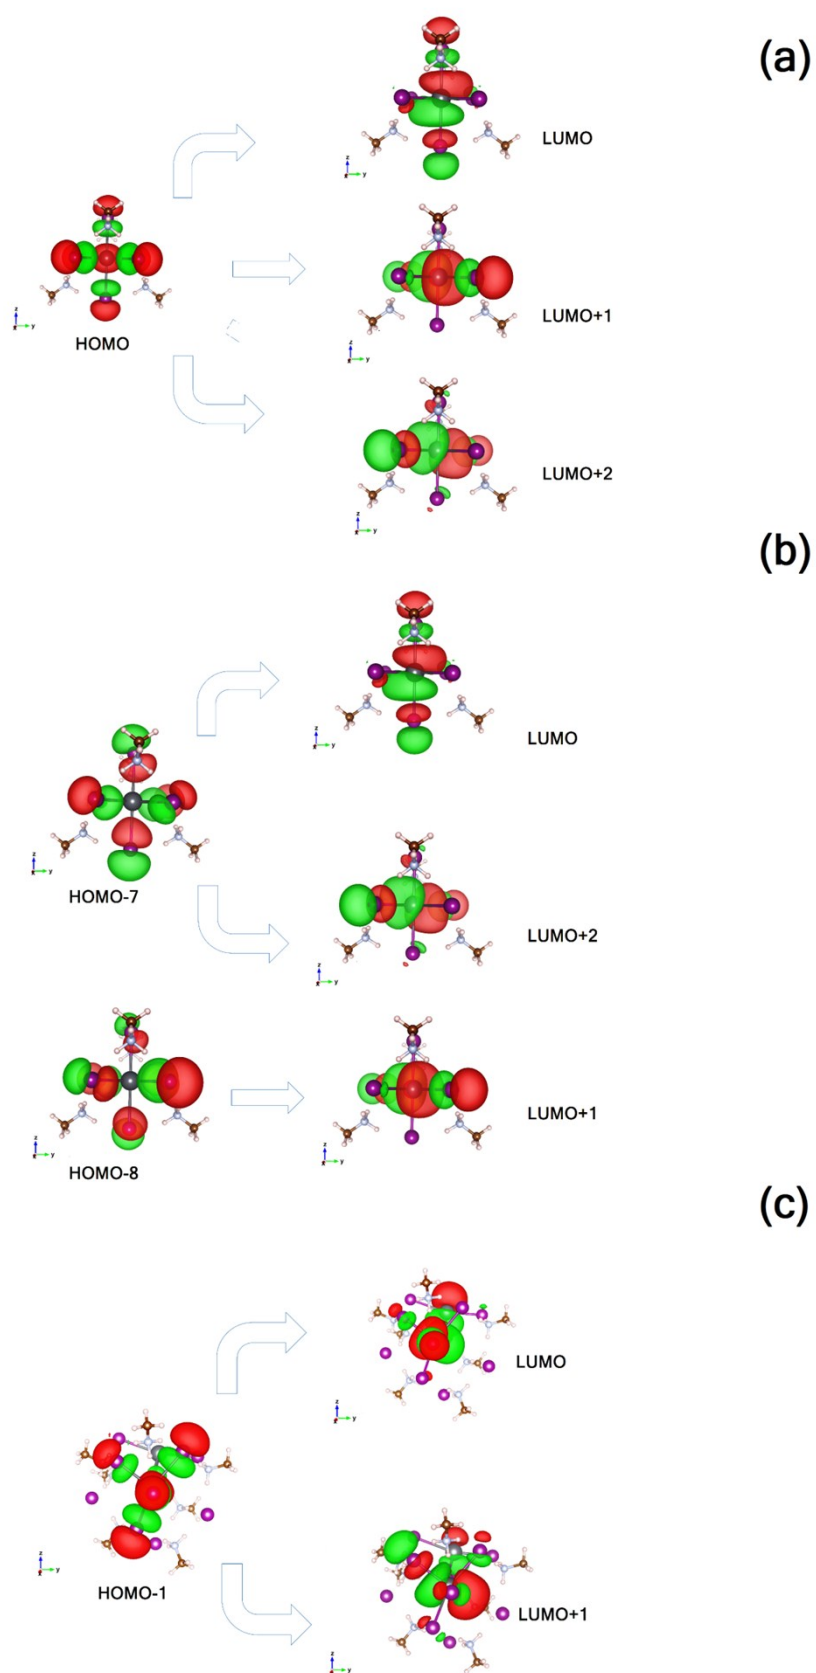

Figure 1 S.I.: Molecular orbitals involved in the main transitions in **1d** (a) at  $\sim 300$  nm, (b) at  $\sim 260$  nm, (c) **2e** at  $\sim 310$  nm. (Isosurface value = 0.02).

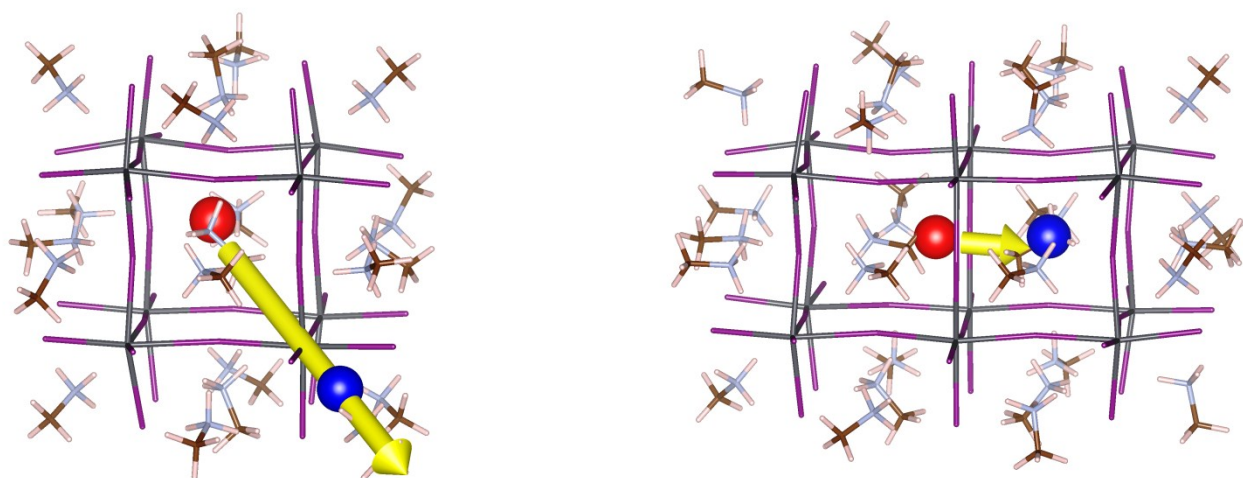

Fig 2 S.I.: (Left) 3D representation of the center of HOMO (red sphere), LUMO (blue sphere), and the intensity of the EDM (yellow arrow) for the most stable Pb octamer structure, i.e. **8c**. (Right) Same for the most stable Pb dodecamer structure (**12b**).
